# Supplementary material
Source: PubMed Central journal article supplement (PMC7809513)
Supplement: mmc1.pdf [file mmc1.pdf]

---

*Supplementary Tables and Figures*

**Strategies to maximize available resources for  
improving radiotherapy accessibility in the post  
COVID-19 era : An analysis for Asia**

---

**Supplementary Table 1:** Modification of the usual time, dose and fractionation with a hypofractionation radiotherapy (HFRT) schedule and its implications on the early and late effects and the weeks gained to treat additional patients in a year

| Standard fractionations prescribed in routine treatments |         |                       |                                                 |                                               | Corresponding mild to moderate hypofractionated schedules |                                                 |                                               |                     |                                      |                                 |
|----------------------------------------------------------|---------|-----------------------|-------------------------------------------------|-----------------------------------------------|-----------------------------------------------------------|-------------------------------------------------|-----------------------------------------------|---------------------|--------------------------------------|---------------------------------|
| % patients                                               | Number* | Schedule              | BED (Early) <sup>†</sup><br>(Gy <sub>10</sub> ) | BED (Late) <sup>‡</sup><br>(Gy <sub>3</sub> ) | Schedule                                                  | BED (Early) <sup>†</sup><br>(Gy <sub>10</sub> ) | BED (Late) <sup>‡</sup><br>(Gy <sub>3</sub> ) | Weeks gained / year | Additional patients treatable / year | Total patients treatable / year |
| 30                                                       | 150     | 70 Gy / 35 fr / 7 wks | 72.5                                            | 116.7                                         | 70 Gy / 30 fr / 6 wks                                     | 77.9                                            | 124.2                                         | 150                 | +25                                  | 175                             |
| 30                                                       | 150     | 60 Gy / 30 fr / 6 wks | 63.7                                            | 100.0                                         | 60 Gy / 25 fr / 5 wks                                     | 69.3                                            | 108.0                                         | 150                 | +30                                  | 180                             |
| 20                                                       | 100     | 50 Gy / 25 fr / 5 wks | 54.9                                            | 83.3                                          | 50 Gy / 20 fr / 4 wks                                     | 60.7                                            | 91.7                                          | 100                 | +25                                  | 125                             |
| 10                                                       | 50      | 30 Gy / 10 fr / 2 wks | 43.6                                            | 60.0                                          | 30 Gy / 10 fr / 2 wks                                     | 43.6                                            | 60.0                                          | -                   | -                                    | 50                              |
| 10                                                       | 50      | <20 Gy / 5 fr / 1 wk  | -                                               | -                                             | 1- 5 fractions/wk                                         | -                                               | -                                             |                     | 0-200 <sup>§</sup>                   | >50                             |

\*Number of patients being treated with standard fractionations assuming radiotherapy to 500 patients/year/teleradiotherapy unit

<sup>†</sup>Biologically effective dose, BED (Early) =  $nd + 1 + d/(\alpha/\beta) - (0.693/\alpha) \times (T - T_k)/T_{pot}$ , where “n” is the number of fractions, “d” dose/fraction, “T”, the overall treatment time and assuming  $\alpha/\beta = 10$  Gy,  $\alpha = 0.3$  Gy<sup>-1</sup>, potential doubling time,  $T_{pot} = 5$  days, and kick-off time,  $T_k = 21$  days

<sup>‡</sup>Biologically effective dose, BED (Late) =  $nd + 1 + d/(\alpha/\beta)$ , where “n” is the number of fractions, “d” the dose/fraction and assuming  $\alpha/\beta = 3$  Gy

<sup>§</sup> Additional patients would be dependent on the number of fractions used and has been assumed to vary from 1 – 5 fractions/week

**Supplementary Table 2:** Cancer incidence for 2020 (from GLOBOCAN), radiotherapy infrastructure (from DIARC, IAEA) (2020) and GNI/capita<sup>1</sup> (Atlas method for various countries from The World Bank) (2018) for various countries in Asia.

| Countries                        | Cancer incidence (2020) | Radiotherapy infrastructure (2020) |                       |                    | GNI/capita (2018) (in US\$) |
|----------------------------------|-------------------------|------------------------------------|-----------------------|--------------------|-----------------------------|
|                                  |                         | TRT (MV) units                     | Particle therapy unit | Brachytherapy unit |                             |
| Afghanistan                      | 20866                   | NA                                 | NA                    | NA                 | 550                         |
| Armenia                          | 9099                    | 3                                  | 0                     | 1                  | 4230                        |
| Azerbaijan                       | 12314                   | 10                                 | 0                     | 1                  | 4050                        |
| Bahrain                          | 1168                    | 2                                  | 0                     | 0                  | 21890                       |
| Bangladesh                       | 160433                  | 35                                 | 0                     | 8                  | 1750                        |
| Bhutan                           | 626                     | NA                                 | NA                    | NA                 | 2970                        |
| Brunei                           | 993                     | 2                                  | 0                     | 0                  | 29660                       |
| Cambodia                         | 16359                   | 2                                  | 0                     | 1                  | 1390                        |
| China                            | 4514447                 | 1644                               | 3                     | 8                  | 9460                        |
| Cyprus                           | 5083                    | 7                                  | 0                     | 2                  | 28570                       |
| DPR, Korea                       | 57714                   | 3                                  | 0                     | 0                  | NA                          |
| Georgia                          | 9451                    | 16                                 | 0                     | 3                  | 4450                        |
| Hong Kong                        | NA                      | 49                                 | 0                     | 8                  | 50300                       |
| India                            | 1219884                 | 638                                | 1                     | 314                | 2020                        |
| Indonesia                        | 368698                  | 60                                 | 0                     | 15                 | 3840                        |
| Iran, Islamic Republic of        | 117676                  | 121                                | 0                     | 14                 | 5470                        |
| Iraq                             | 27176                   | 19                                 | 0                     | 0                  | 5040                        |
| Israel                           | 28083                   | 34                                 | 0                     | 10                 | 40930                       |
| Japan                            | 904856                  | 942                                | 21                    | 224                | 41310                       |
| Jordan                           | 11612                   | 14                                 | 0                     | 1                  | 4200                        |
| Kazakhstan                       | 35382                   | 45                                 | 0                     | 18                 | 8080                        |
| Kuwait                           | 3968                    | 4                                  | 0                     | 1                  | 34290                       |
| Kyrgyzstan                       | 6941                    | 2                                  | 0                     | 1                  | 1220                        |
| Lao People's Democratic Republic | 8203                    | 2                                  | 0                     | 0                  | 2450                        |
| Lebanon                          | 17926                   | 23                                 | 0                     | 3                  | 7920                        |
| Macao                            | NA                      | 2                                  | 0                     | 1                  | 79110                       |

| Countries            | Cancer incidence (2020) | Radiotherapy infrastructure (2020) |                       |                    | GNI/capita (2018) (in US\$) |
|----------------------|-------------------------|------------------------------------|-----------------------|--------------------|-----------------------------|
|                      |                         | TRT (MV) units                     | Particle therapy unit | Brachytherapy unit |                             |
| Malaysia             | 46873                   | 54                                 | 0                     | 11                 | 10590                       |
| Maldives             | 457                     | NA                                 | NA                    | NA                 | 9280                        |
| Mongolia             | 6028                    | 5                                  | 0                     | 1                  | 3660                        |
| Myanmar              | 73219                   | 21                                 | 0                     | 7                  | 1310                        |
| Nepal                | 27533                   | 7                                  | 0                     | 3                  | 970                         |
| Oman                 | 3653                    | 2                                  | 0                     | 1                  | 15140                       |
| Pakistan             | 184520                  | 57                                 | 0                     | 14                 | 1590                        |
| Palestine            | NA                      | NA                                 | NA                    | NA                 | NA                          |
| Philippines          | 149342                  | 51                                 | 0                     | 15                 | 3830                        |
| Qatar                | 1419                    | 3                                  | 0                     | 1                  | 61150                       |
| Saudi Arabia         | 26634                   | 32                                 | 0                     | 9                  | 21600                       |
| Singapore            | 28661                   | 23                                 | 0                     | 6                  | 58770                       |
| South Korea          | 292699                  | 160                                | 2                     | 42                 | 30620                       |
| Sri Lanka            | 24559                   | 16                                 | 0                     | 3                  | 4060                        |
| Syrian Arab Republic | 24839                   | 7                                  | 0                     | 2                  | NA                          |
| Taiwan               | NA                      | 75                                 | 1                     | 20                 | NA                          |
| Tajikistan           | 5966                    | 1                                  | 0                     | 1                  | 1010                        |
| Thailand             | 179548                  | 101                                | 0                     | 28                 | 6610                        |
| Timor-Leste          | 690                     | NA                                 | NA                    | NA                 | 1810                        |
| Turkey               | 223255                  | 266                                | 0                     | 31                 | 10420                       |
| Turkmenistan         | 6194                    | 7                                  | 0                     | 4                  | 6740                        |
| United Arab Emirates | 5392                    | 5                                  | 0                     | 1                  | 40880                       |
| Uzbekistan           | 27105                   | 7                                  | 0                     | 2                  | 2020                        |
| Viet Nam             | 174636                  | 37                                 | 0                     | 10                 | 2360                        |
| Yemen                | 14073                   | 1                                  | 0                     | 0                  | NA                          |

TRT (MV): Megavoltage teleradiotherapy unit

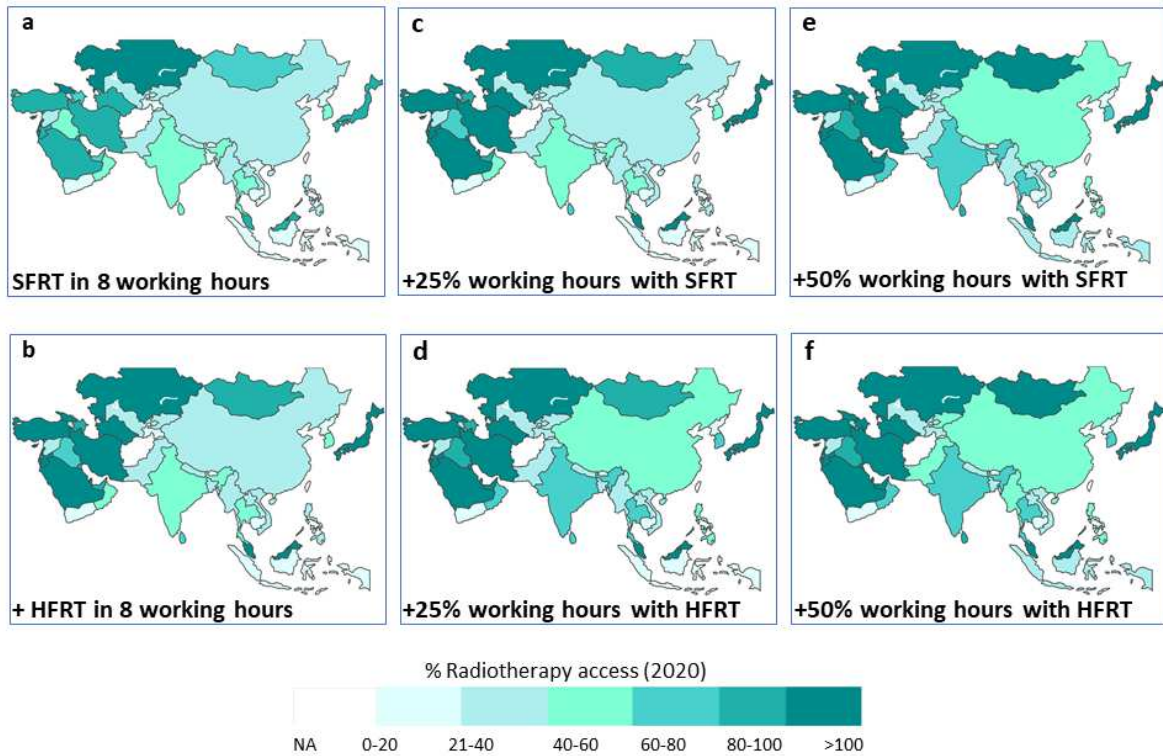

**Supplementary Fig. 1** Changes in the % radiotherapy access in categories of 1-20%, 21-40%, 41-60%, 61-80%, 81-100% and >100% for various strategies. The data represents 43 target countries.

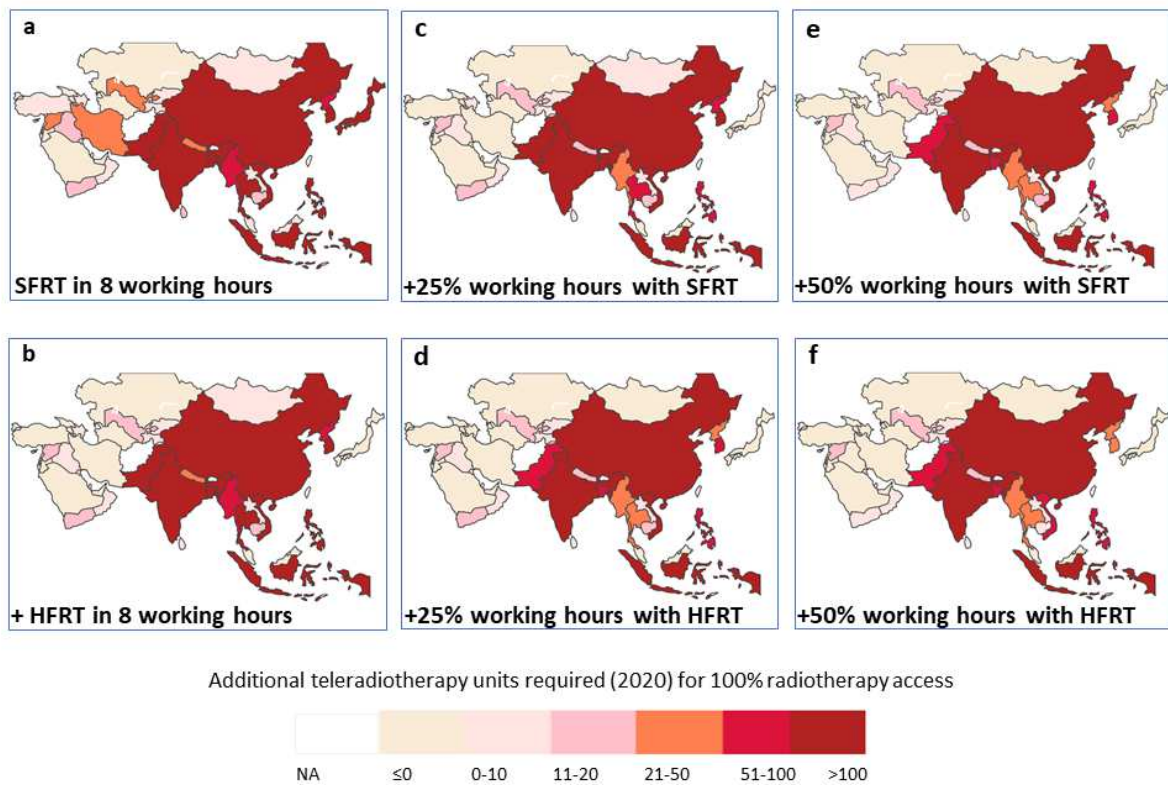

**Supplementary Fig. 2** Changes in the additional teleradiotherapy units (TRT) in categories of ≤0, 1-10, 11-20, 21-50, 51-100 and >100 for various strategies. The data represents 43 target countries
